# Supplementary material for: Mathematical model based on staircase structure for porous electrode impedance
Source: Royal Society of Chemistry journal article supplement (doi:10.1039/d2cp02502g), 2022-01-01
Supplement: d2cp02502g1.pdf [file d2cp02502g1.pdf]

## Supplemental information

# Mathematical Model Based on Staircase Structure for Porous Electrode Impedance

Nobuhiro Ogihara\* and Yuichi Itou

Toyota Central R&D Laboratories Inc., Nagakute, Aichi 480-1192, Japan

\*e-mail: [ogihara@mosk.tytlabs.co.jp](mailto:ogihara@mosk.tytlabs.co.jp)

### General theory for resistance and capacitance in AC impedance

When given the voltage ( $E$ ) and current ( $I$ ) as a function of AC frequency ( $\omega$ ), the impedance component ( $Z(\omega)$ ) respectively, can be shown as follows <sup>1,2</sup>:

$$Z(\omega) = \frac{E(\omega)}{I(\omega)} \quad (1)$$

where  $\omega (= 2\pi f, f$  is the frequency (Hz)) is the angular velocity.

Here, resistance and capacitance as impedance component are considered ( $Z_R$  and  $Z_C$ , respectively).

$Z_R$ , consisting of resistance ( $R$ ), can be expressed by the relation  $E(\omega) = RI(\omega)$ , as in the following equation:

$$Z_R = R \quad (2)$$

This equation is not affected by AC frequency.

On the other hand, the current  $I(\omega)$  in the presence of electric double layer capacitance ( $C_{dl}$ ) can be shown as the following equation using the relation  $Q = C_{dl}E(\omega)$  when charge ( $Q$ ) is differentiated with time ( $t$ ):

$$I(\omega) = \frac{dQ}{dt} = C_{dl} \frac{\partial E(\omega)}{\partial t} \quad (3)$$

The time derivative of  $E(\omega)$  in AC results in  $j\omega E(\omega)$ , so  $I(\omega) = j\omega C_{dl}E(\omega)$ . Therefore,  $Z_C$  can be shown as follows:

$$Z_C = (j\omega C_{dl})^{-1} \quad (4)$$

where  $j$  is an imaginary number. This equation is affected by AC frequency.

These are used as impedance components for equivalent circuit design.

### Complex capacitance theory

Impedance ( $Z(\omega)$ ) and complex capacitance ( $C(\omega)$ ) are related as follows<sup>3,4</sup>.

$$C(\omega) = \frac{1}{j\omega Z(\omega)} \quad (5)$$

Based on the definition of complex impedance ( $Z(\omega) = Z_{re} + jZ_{im}$ ), the complex capacitance ( $C(\omega) = C_{re} + jC_{im}$ ) is considered as follows.

$$C(\omega) = \frac{1}{j\omega(Z_{re} + jZ_{im})} \quad (6)$$

Here, the real ( $C_{re}$ ) and the imaginary ( $C_{im}$ ) parts are expressed as follows.

$$C_{re} = \frac{-Z_{im}}{\omega|Z(\omega)|^2} \quad (7)$$

$$C_{im} = \frac{Z_{re}}{\omega|Z(\omega)|^2} \quad (8)$$

## Program details

### Program for Python for impedance spectra of non-Faradaic process in a staircase model

```
import numpy as np # importing modules for using NumPy
import pandas as pd # importing modules for using Pandas
import cmath # importing modules for using imaginary number
import math # importing modules for using pi

# input parameters
Re = 0.001 # input electric resistance
Rion = 0.03 # input ionic resistance
C = 0.001 # input electric double-layer capacitance

# setting the frequency
a = np.arange(91) # generating an isoperimetric sequence
f = 10**(a/10 - 3) # frequency range: 10^-3~10^+3 Hz
w = 2 * math.pi * f # angular velocity

# setting the capacitance
jwc = w * C * 1j # The notation "1j" is used to handle imaginary numbers in Python

# Calculation of impedance using recursive function
i = 100 # number of step
def z_n(i):
    if i < 1:
        return Rion + (Re + 1/jwc) # i=0
    return Rion + (1/(1/z_n(i - 1) + 1/(Re + 1/jwc))) # i>1
ans_n = z_n(i)

Rre = ans_n.real - Rion # Real part of impedance
Rim = -ans_n.imag # Imaginary part of impedance
# output data
df_non_faradaic = pd.DataFrame(list(zip(w, Rre, Rim)), columns = ["Frequency (Hz)", "Rre_n-f",
"Rim_n-f"])
df_non_faradaic
```

## Program for Python for impedance spectra of Faradaic process in a staircase model

```
import numpy as np # importing modules for using NumPy
import pandas as pd # importing modules for using Pandas
import cmath # importing modules for using imaginary number
import math # importing modules for using pi

# input parameters
Re = 0.001 # input electric resistance
Rion = 0.03 # input ionic resistance
Rct = 400 # input charge-transfer resistance
C = 0.001 # input electric double-layer capacitance

# setting the frequency
a = np.arange(91) # generating an isoperimetric sequence
f = 10**(a/10 - 3) # frequency range: 10-3~10+3 Hz
w = 2 * math.pi * f # angular velocity

# setting the capacitance
jwc = w * C * 1j # The notation "1j" is used to handle imaginary numbers in Python

# Calculation of impedance using recursive function
i = 100 # number of step
def z_f(i):
    if i < 1:
        return Rion + (Re + 1/(1/Rct + jwc)) # i=0
    return Rion + (1/(1/z_f(i-1) + 1/(Re + 1/(1/Rct + jwc)))) # i>1
ans_f = z_f(i)

Rre = ans_f.real - Rion # Real part of impedance
Rim = -ans_f.imag # Imaginary part of impedance
# output data
df_faradaic = pd.DataFrame(list(zip(w, Rre, Rim)), columns = ["Frequency (Hz)", "Rre_f",
"Rim_f"])
df_faradaic
```

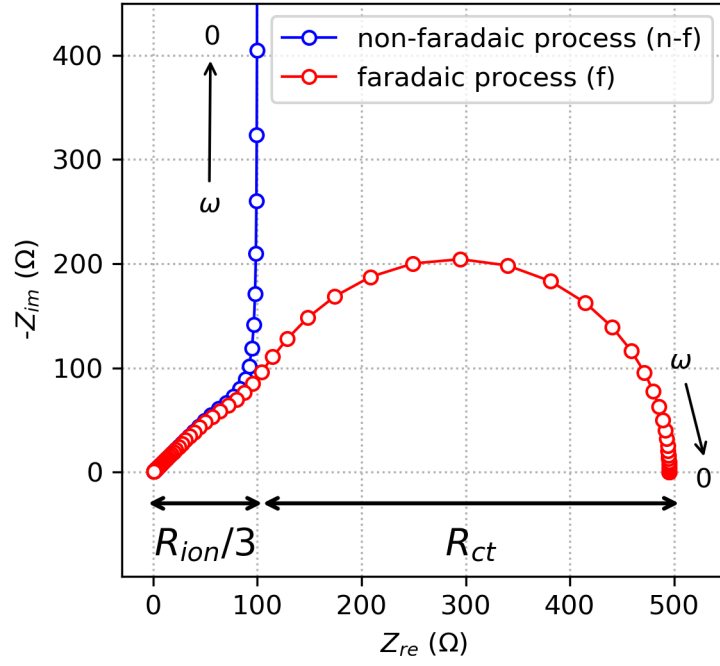

**Fig. S1** Nyquist plots of non-Faradaic and Faradaic processes in the transmission line model calculated using Equations (6) and (7). Input parameters:  $2\pi r = 1 \text{ cm}$ ,  $L = 1 \text{ cm}$ ,  $R_{sol} = 0 \Omega$ ,  $R_{ion, L} = 300 \Omega \text{ cm}^{-1}$ ,  $R_{ct, A} = 400 \Omega \text{ cm}^2$ ,  $C_{dl, A} = 0.1 \text{ mF cm}^{-2}$ .

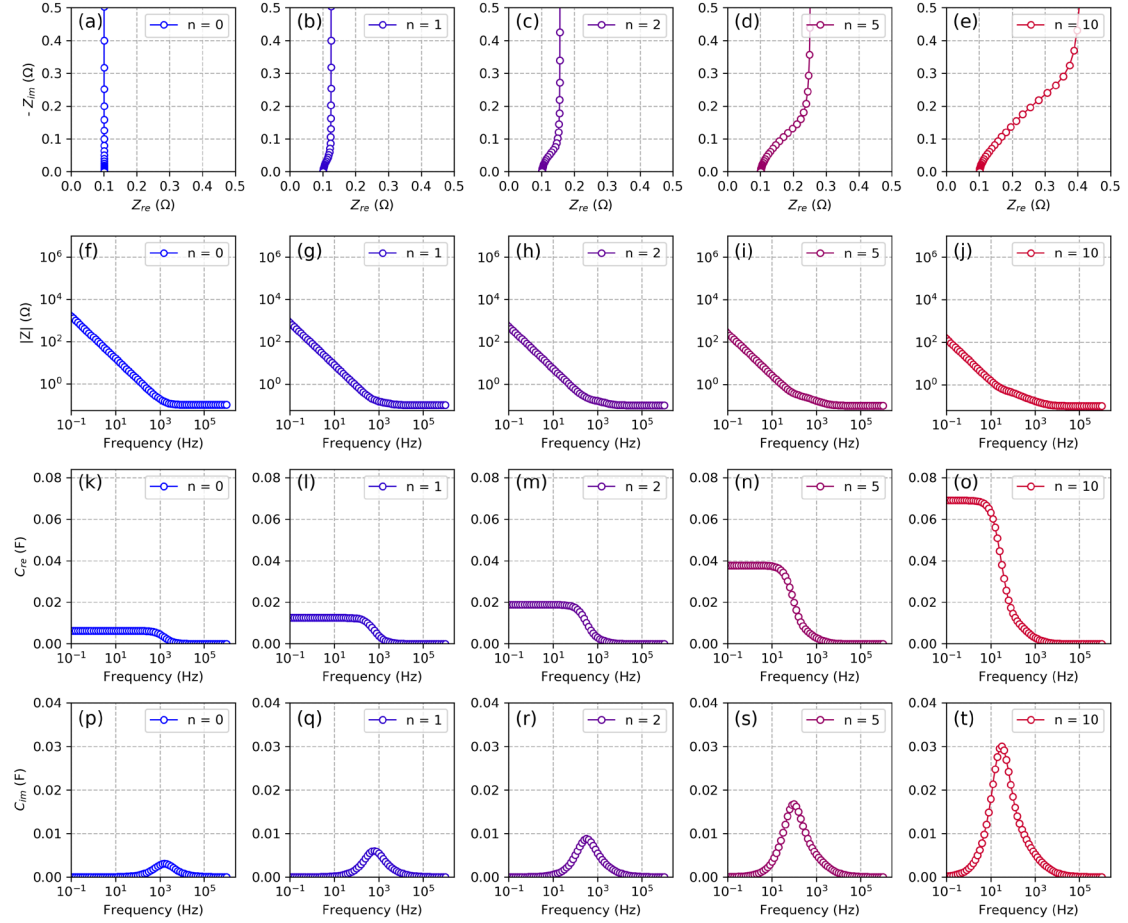

**Fig. S2** (a-e) Nyquist plots, and frequency properties of (f-j) absolute value of resistance ( $|Z|$ ), (k-o) the real part ( $C_{re}$ ), and (p-t) imaginary part ( $C_{im}$ ) of complex capacitance for non-Faradaic processes at step numbers ( $n$ ) = 0, 1, 2, 5 and 10 calculated using the staircase model. Input parameters:  $R_{e, in} = 1 \text{ m}\Omega$ ,  $R_{ion, in} = 0.1 \Omega$ , and  $C_{dl, in} = 1 \text{ mF}$ . The calculation results of the frequency characteristics of the capacitance in non-Faradaic process obtained using the complex capacitance theory<sup>3,4</sup> show that as  $n$  is increased,  $C_{re}$  reaching at the low frequency region increases, while the peak of the capacitance behaviour of  $C_{im}$  shifts to the low frequency. These capacitance behaviours are typical of non-Faradaic process, and are in good agreement with the behaviour when the electrode thickness is increased.<sup>3</sup>

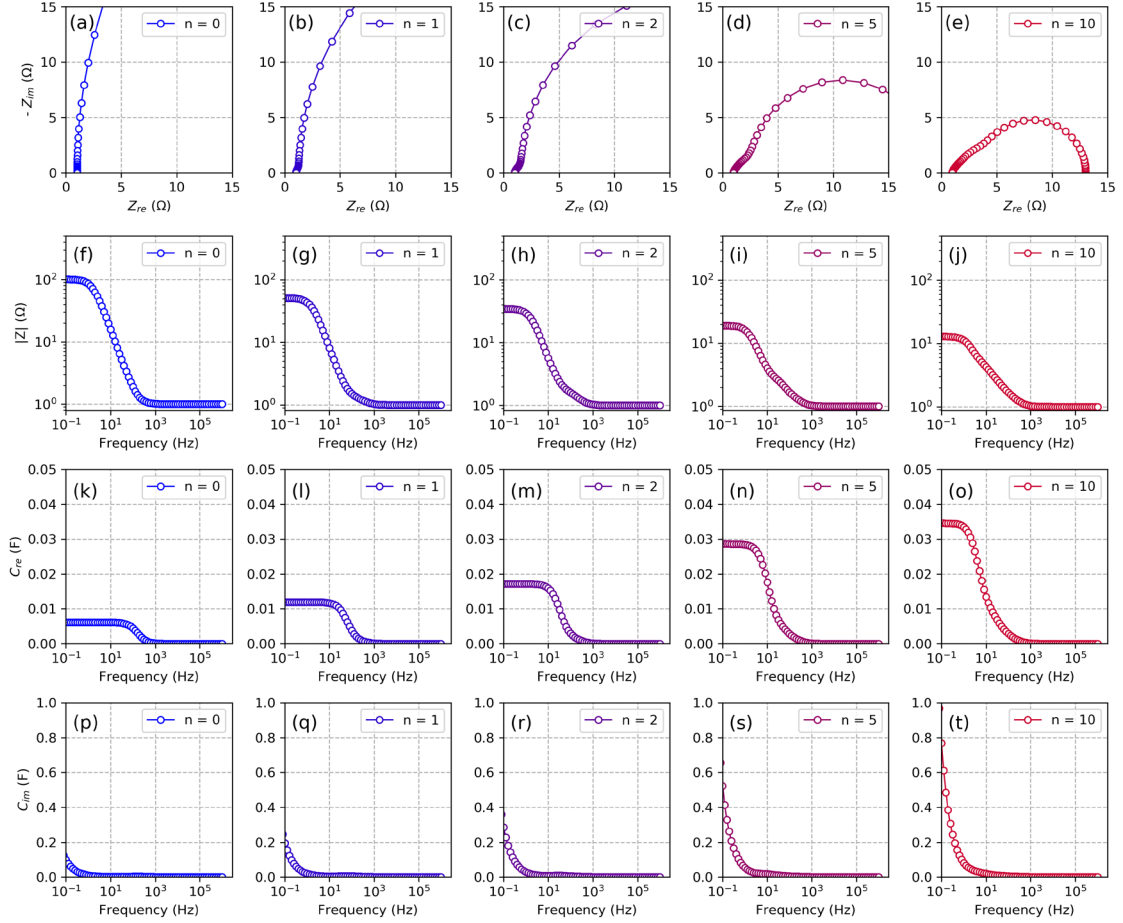

**Fig. S3** (a-e) Nyquist plots, and frequency properties of (f-j) absolute value of resistance ( $|Z|$ ), (k-o) the real part ( $C_{re}$ ), and (p-t) imaginary part ( $C_{im}$ ) of complex capacitance for Faradaic processes at  $n = 0, 1, 2, 5$  and  $10$  calculated using the staircase model. Input parameters:  $R_{e, in} = 1 \text{ m}\Omega$ ,  $R_{ion, in} = 0.1 \text{ }\Omega$ ,  $R_{ct, in} = 100 \text{ }\Omega$ , and  $C_{dl, in} = 1 \text{ mF}$ . In Faradaic process, although  $C_{re}$  shows similar behaviour to that of the non-Faradaic process,  $C_{im}$  shows a tail toward the low frequency region without a peak. The value of  $C_{im}$  for Faradaic process is about two orders of magnitude larger than that for the non-Faradaic process, which is in good agreement with the behaviour reflecting the effect of the current corresponding to Faradaic process.<sup>5</sup>



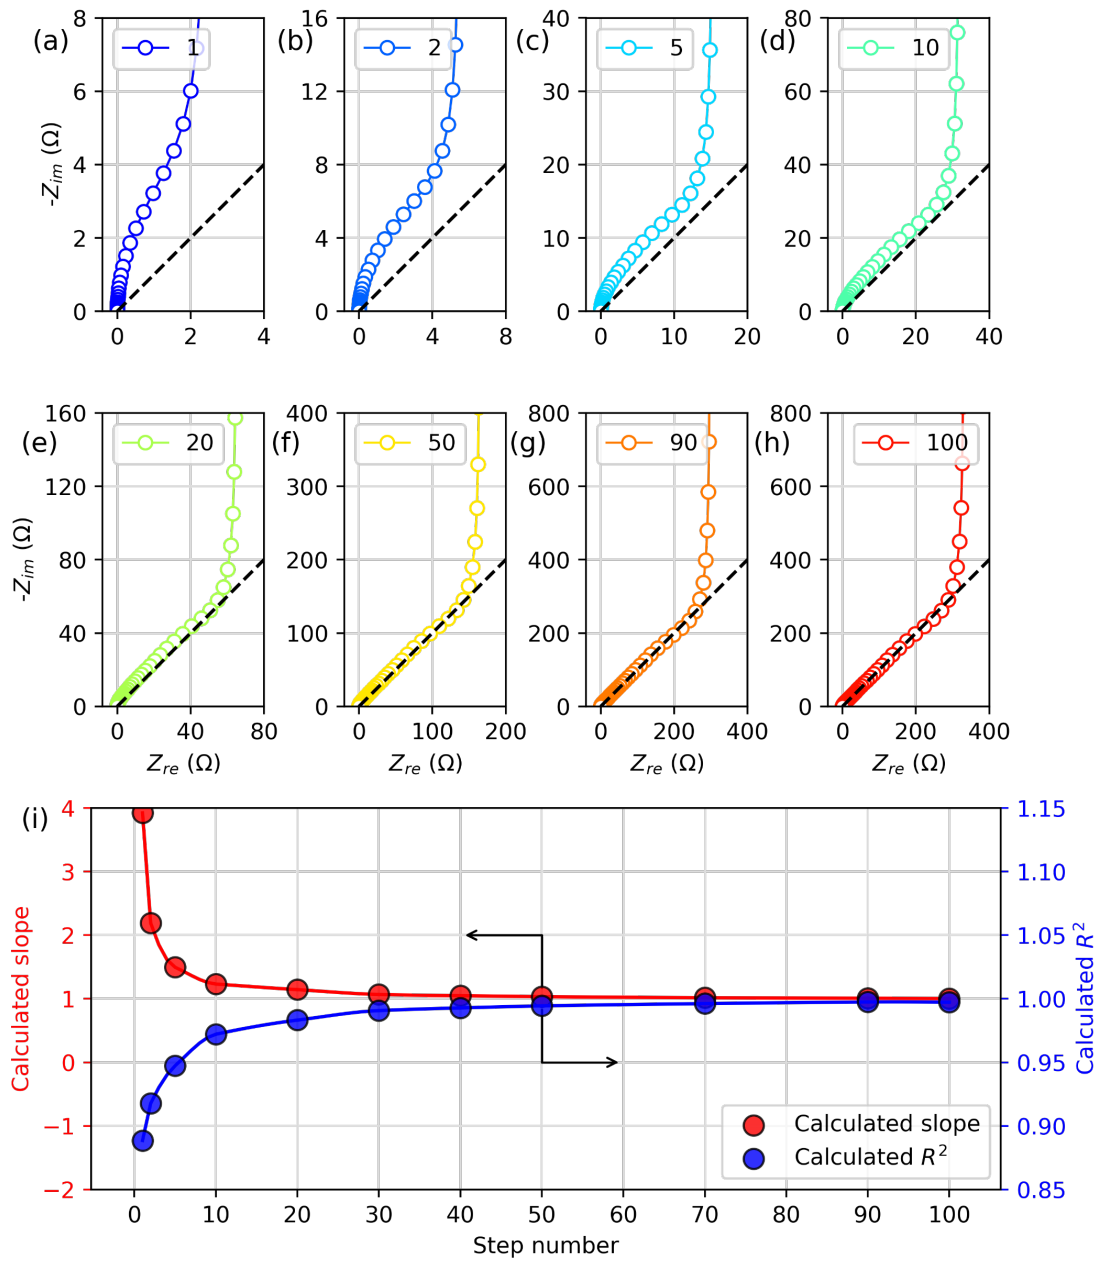

**Fig. S4** (a-h) Detailed change in the Nyquist plots of non-Faradaic process in the high-frequency region for different  $n$  calculated using the staircase model. (i) Variation in the slope and coefficient of determination ( $R^2$ ) of the linear approximation in the high-frequency region of the Nyquist plots for non-Faradaic process vs. the number of steps. Input parameters:  $n = 1-100$ ,  $R_{e, in} = 1 \text{ m}\Omega$ ,  $R_{ion, in} = 10 \text{ }\Omega$ , and  $C_{dl, in} = 1 \text{ mF}$ .

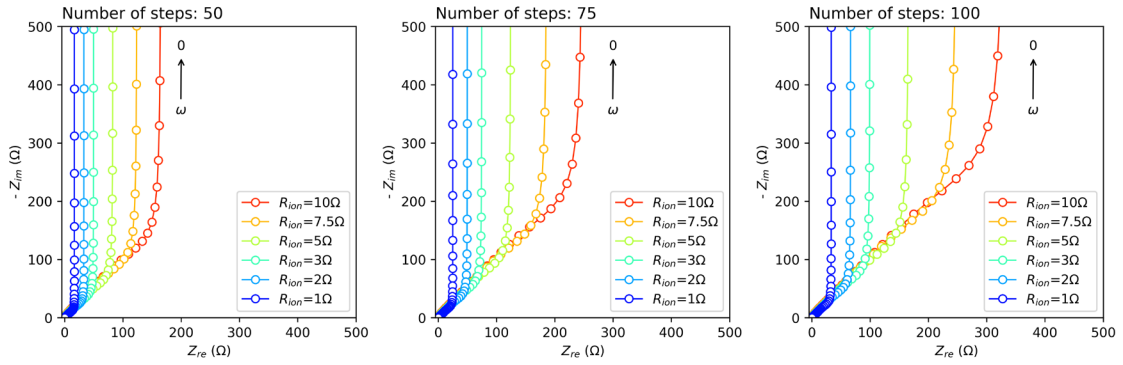

**Fig. S5** Nyquist plots of non-Faradaic processes for each  $R_{ion, in}$  at  $n = 50, 75,$  and  $100$  calculated using the staircase model. Input parameters:  $R_{e, in} = 1 \text{ m}\Omega$ ,  $R_{ion, in} = 1\text{--}10 \Omega$ , and  $C_{dl, in} = 1 \text{ mF}$ .

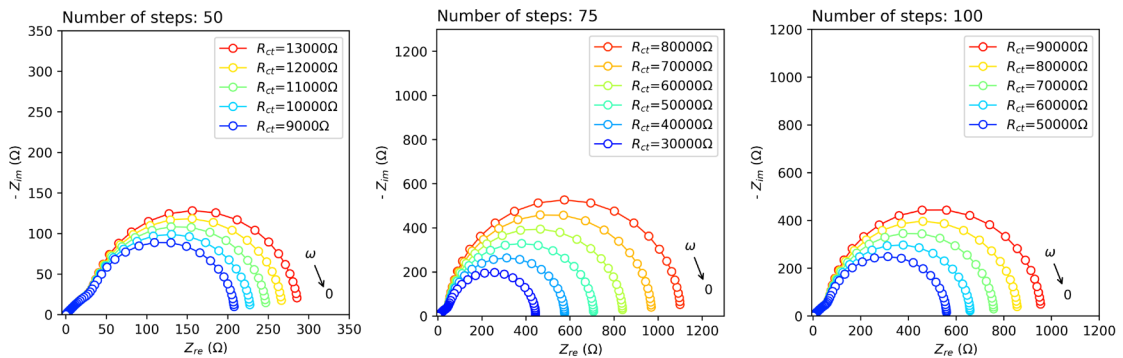

**Fig. S6** Nyquist plots of Faradaic processes for each  $R_{ct, in}$  at  $n = 50, 75$  and  $100$  calculated using the staircase model. Input parameters:  $R_{e, in} = 1 \text{ m}\Omega$ ,  $R_{ion, in} = 2 \Omega$ ,  $R_{ct, in} = 9\text{--}90 \text{ k}\Omega$ , and  $C_{dl, in} = 1 \text{ mF}$ .

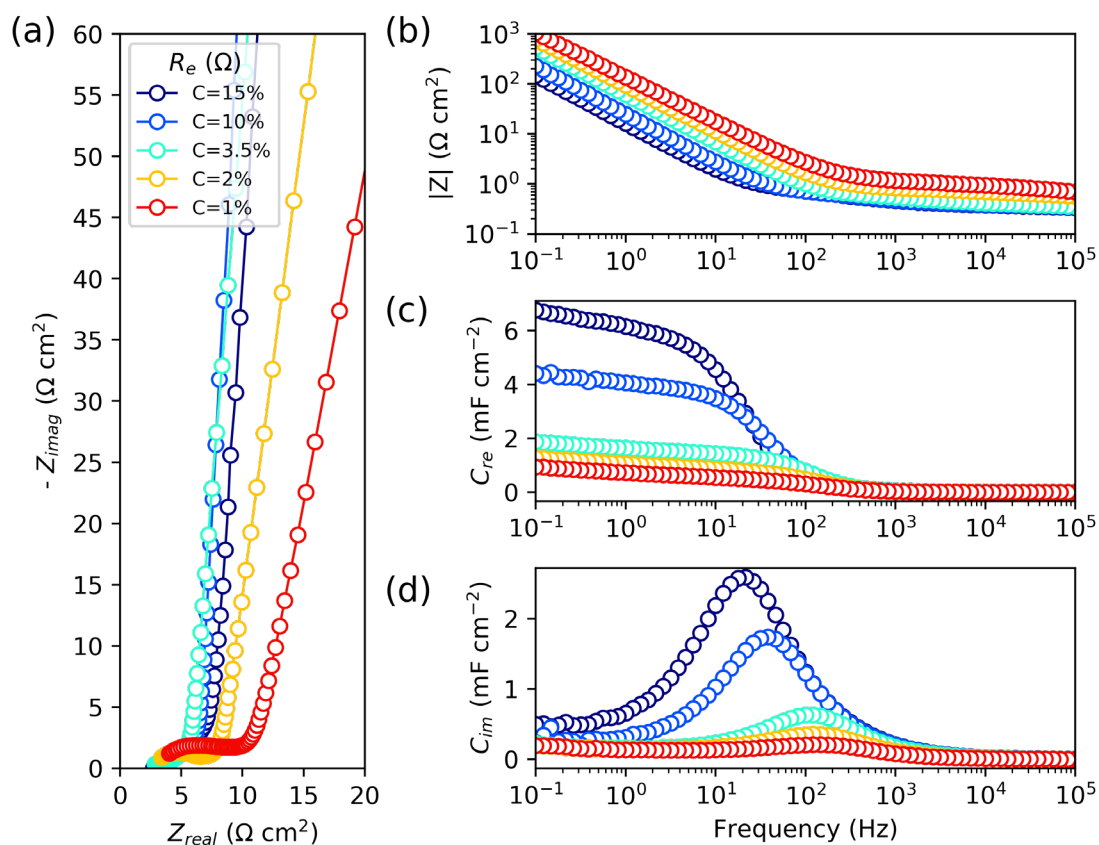

**Fig. S7** (a) Nyquist plots, (b) Absolute value of resistance ( $|Z|$ ), (c) Real part ( $C_{re}$ ), and (d) Imaginary part ( $C_{im}$ ) of complex capacitance for symmetric cells using two positive electrodes in 1.0 M  $\text{LiPF}_6$  in EC/DMC/EMC (30/40/40 volume ratio) at 20 °C. The positive electrode composition was  $\text{LiNi}_{0.75}\text{Co}_{0.15}\text{Al}_{0.05}\text{Mg}_{0.05}\text{O}_2$ , carbon black, and PVDF at C = 1% (98/1/1), C = 2% (96/2/2), C = 3.5% (94/4/2), C = 10% (85/10/5), C = 15% (80/15/5) (weight ratio). Loading weight:  $\sim 10.5 \text{ mg cm}^{-2}$ . Electrodes were uncharged (state of charge = 0%).

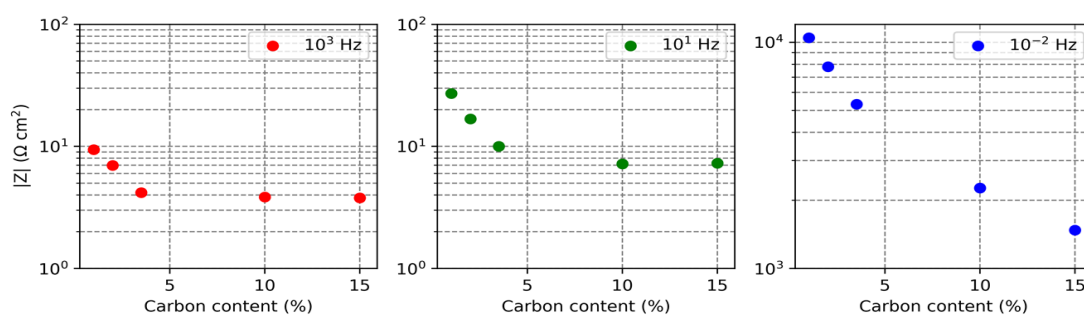

**Fig. S8** Dependence of the absolute value of resistance ( $|Z|$ ) on the conducting carbon ratio at frequencies of  $10^3$ ,  $10^1$ , and  $10^{-1}$  Hz for electrochemical impedance spectroscopy measured using the same symmetric cell as in **Fig. S7(b)**. With respect to the ratio of conductive carbon,  $|Z|$  at low frequencies of  $10^{-2}$  Hz shows linearity, while that at high frequencies of  $10^1$  and  $10^3$  Hz show nonlinearity. This suggests that the behavior in the high frequency region due to the electronic resistance is independent of the ratio of the conducting carbon.

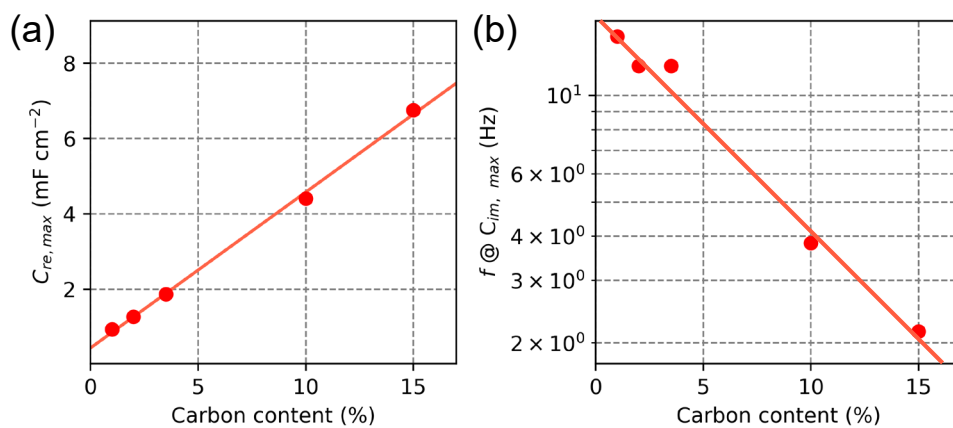

**Fig. S9** Dependence of (a) the maximum value of the real part ( $C_{re,max}$ ) and (b) the frequency showing the maximum value of the imaginary part ( $f @ C_{im,max}$ ) in the complex capacitance results measured using the same symmetric cell as shown in **Fig. S7(c)** and **d**, respectively, on the conducting carbon ratio. These relationships mean that  $C_{re,max}$  and  $f @ C_{im,max}$  show linear variation at all conductive carbon ratios.

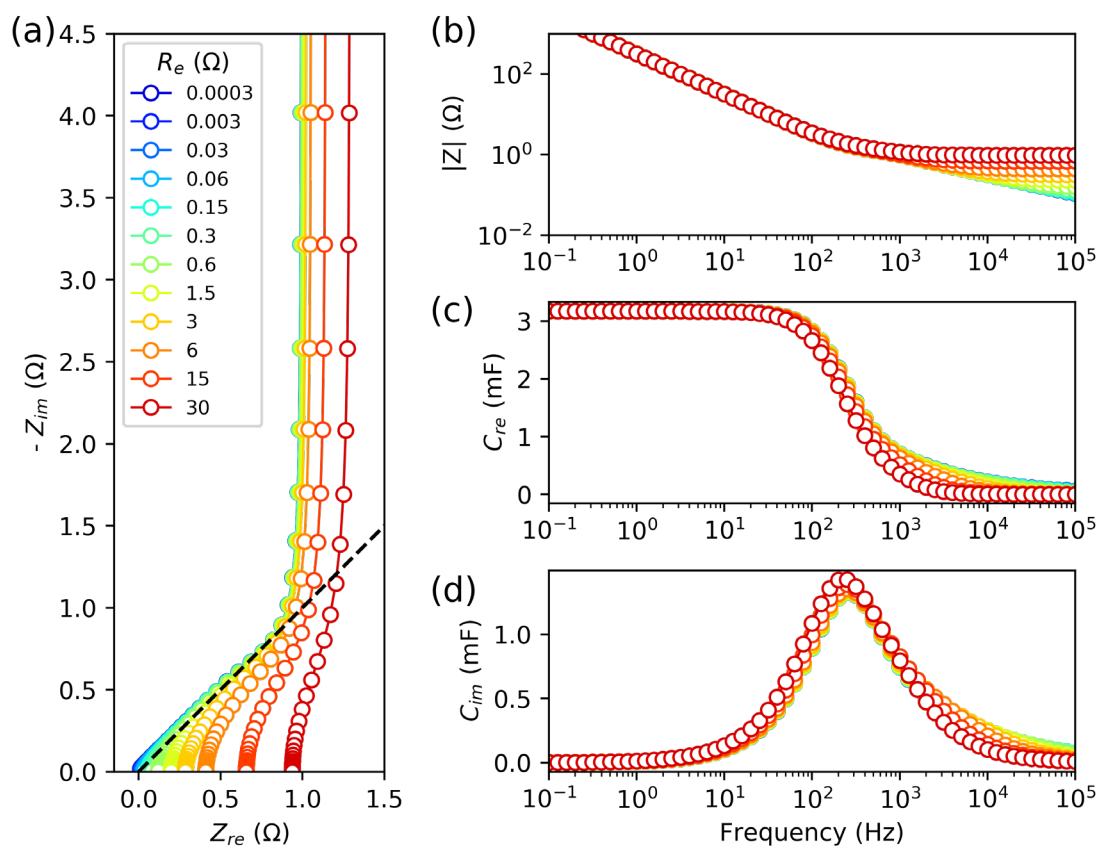

**Fig. S10** (a) Nyquist plots, (b) Absolute value of resistance ( $|Z|$ ), (c) Real part ( $C_{re}$ ), and (d) Imaginary part ( $C_{im}$ ) of complex capacitance for non-Faradaic processes when electronic resistance is varied uniformly using the staircase model defined as (i) uniform change in Fig. 7(c). Input parameters:  $n = 100$ ,  $R_{e, in} = 0.3 \text{ m}\Omega$ - $30 \text{ }\Omega$ ,  $R_{ion, in} = 30 \text{ m}\Omega$ , and  $C_{dl, in} = 5 \text{ }\mu\text{F}$ .

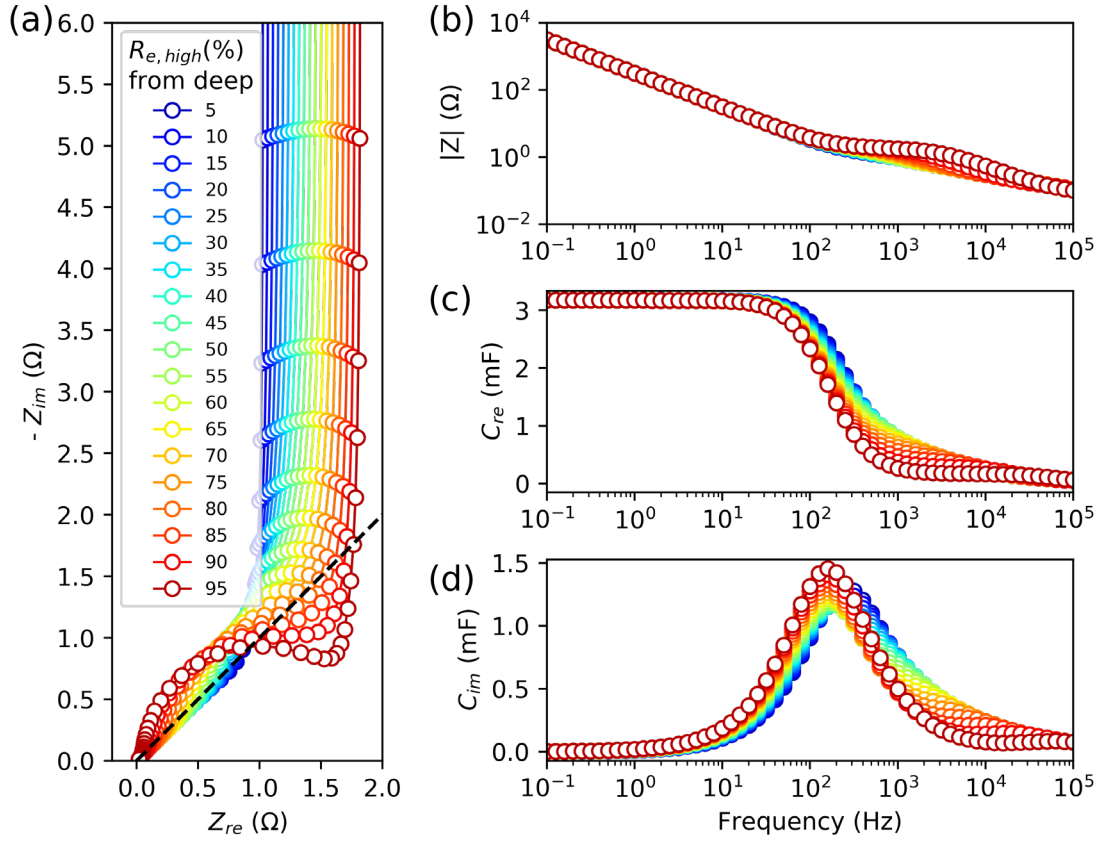

**Fig. S11** (a) Nyquist plots, (b) Absolute value of resistance ( $|Z|$ ), (c) Real part ( $C_{re}$ ), and (d) Imaginary part ( $C_{im}$ ) of complex capacitance for non-Faradaic processes when electronic resistance is varied non-uniformly using the staircase model defined as (ii) non-uniform change A in Fig. 7(c). Input parameters:  $n = 100$ , Electronic resistance ( $R_e$ ) for deep/shallow regions =  $R_{e,high}/R_{e,low}$  (5/95 to 95/5),  $R_{e,high} = 90 \Omega$ ,  $R_{e,low} = 30 \text{ m}\Omega$ ,  $R_{ion,in} = 30 \text{ m}\Omega$ , and  $C_{dl,in} = 5 \mu\text{F}$ .

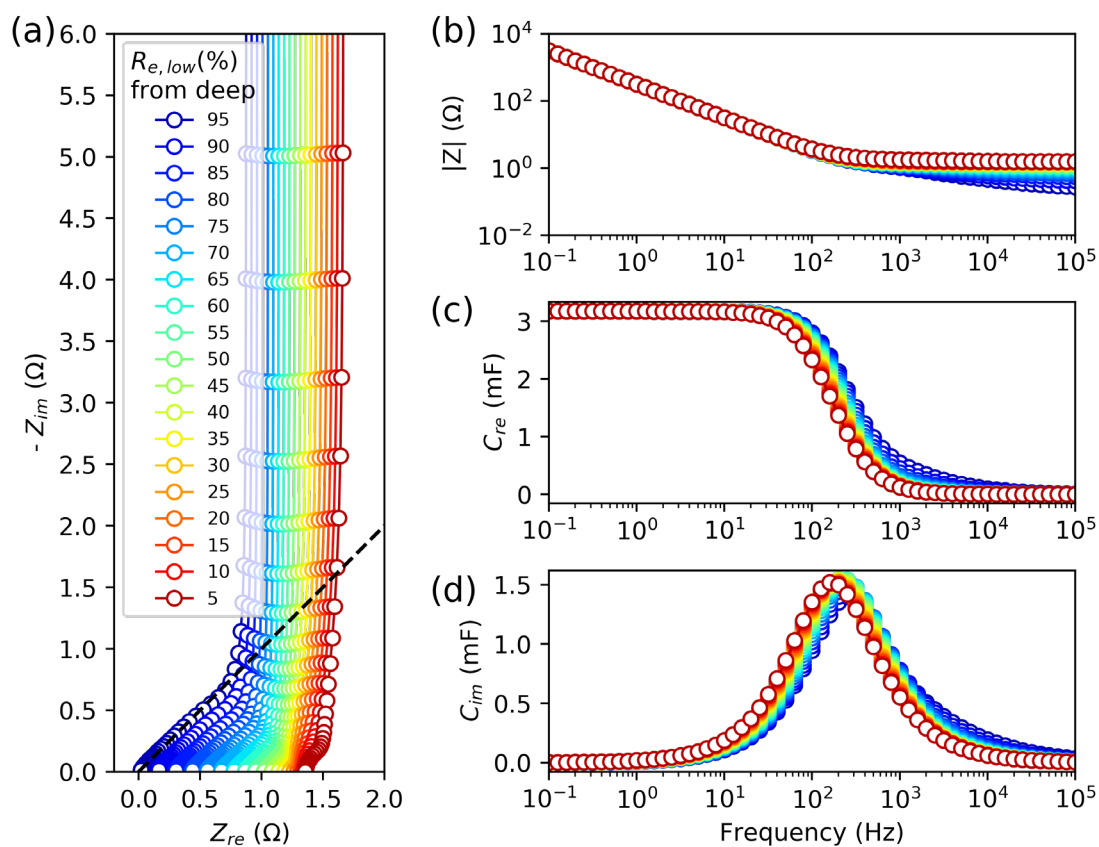

**Fig. S12** (A) Nyquist plots, (B) Absolute value of resistance ( $|Z|$ ), (C) Real part ( $C_{re}$ ), and (D) Imaginary part ( $C_{im}$ ) of complex capacitance for non-Faradaic processes when electronic resistance is varied non-uniformly using the staircase model defined as (iii) non-uniform change B in Fig. 7(c). Input parameters:  $n = 100$ , Electronic resistance ( $R_e$ ) for deep/shallow regions =  $R_{e, low}/R_{e, high}$  (95/5 to 5/95),  $R_{e, high} = 90 \Omega$ ,  $R_{e, low} = 30 \text{ m}\Omega$ ,  $R_{ion, in} = 30 \text{ m}\Omega$ , and  $C_{dl, in} = 5 \mu\text{F}$ .



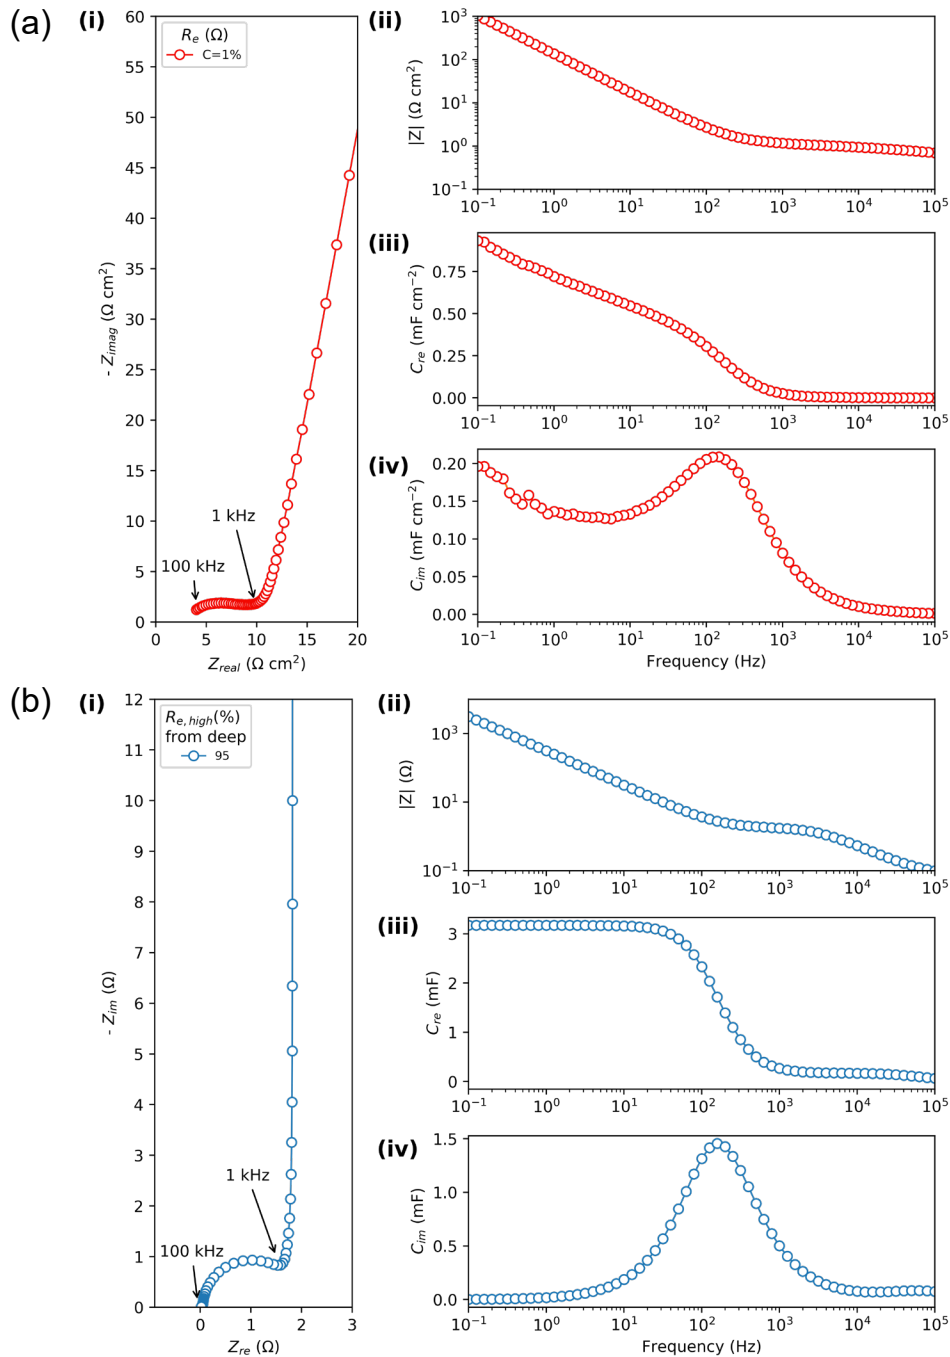

**Fig. S13** (i) Nyquist plot, (ii) Absolute value of resistance ( $|Z|$ ), (iii) Real part ( $C_{re}$ ), and (iv) Imaginary part ( $C_{im}$ ) of complex capacitance (a) from the actual experimental result of symmetric cells using positive electrode with low carbon of 1% in **Fig. S7**, and (b) from the calculated result using staircase modes obtained from the condition of non-uniform A at  $R_{e,high}$  ratio from deep = 95% in **Fig. S11**. Both results show good agreement in the shape similarity in the Nyquist plot from 100 kHz–1 kHz and in the frequency response.

## References

1. M. Itagaki, S. Suzuki, I. Shitanda and K. Watanabe, *Electrochemistry*, 2007, **75**, 649-655.
2. A. J. Bard, L. R. Faulkner, J. Leddy and C. G. Zoski, *Electrochemical methods: fundamentals and applications*, Wiley New York, 1980.
3. P. L. Taberna, P. Simon and J. F. Fauvarque, *J. Electrochem. Soc.*, 2003, **150**, A292-A300.
4. J. H. Jang and S. M. Oh, *J. Electrochem. Soc.*, 2004, **151**, A571-A577.
5. J. H. Jang, S. Yoon, B. H. Ka, Y. H. Jung and S. M. Oh, *J. Electrochem. Soc.*, 2005, **152**, A1418-A1422.
